# Supplementary material for: Reversed Controlled Polymerization (RCP): Depolymerization from Well-Defined Polymers to Monomers
Source: PubMed Central journal article supplement — J Am Chem Soc. 2023 May 1;145(18):9898–915. doi: 10.1021/jacs.3c00589 (PMC10176471; doi:10.1021/jacs.3c00589), 2023-05-01
Supplement: ja3c00589_si_001.pdf [file ja3c00589_si_001.pdf]

## Supporting Information

### Reversed Controlled Polymerization (RCP): Depolymerization from Well-defined Polymers to Monomers

Glen R. Jones, Hyun Suk Wang, Kostas Parkatzidis, Richard Whitfield, Nghia P. Truong, and Athina Anastasaki\*

<sup>1</sup> Laboratory for Polymeric Materials, Department of Materials, ETH Zürich, Vladimir-Prelog-Weg 5, 8093 Zürich, Switzerland

\*Athina Anastasaki: [athina.anastasaki@mat.ethz.ch](mailto:athina.anastasaki@mat.ethz.ch)

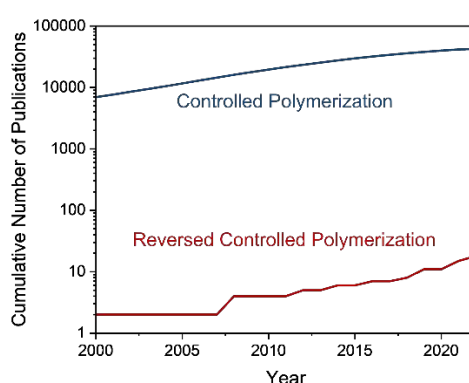

**Figure 1:** A comparison between the numbers of publications on controlled polymerization vs. depolymerization since the year 2000.

The data from figure 1 was obtained using Web of Science™. The following search terms were used:

For Cationic: "cationic polymerization"

For Anionic: "anionic polymerization"

For GTP: "Group transfer polymerization"

For NMP: "Nitroxide-mediated radical polymerization", "Nitroxide mediated radical polymerization", "Nitroxide-mediated polymerization"

For ATRP: "Atom transfer radical polymerization", "Copper-Mediated Living Polymerization", "Cu (0)-mediated living radical polymerization", "Copper-Mediated Living Radical Polymerization", SET-LRP

For RAFT: "Reversible addition-fragmentation chain-transfer polymerization", "Reversible addition fragmentation chain transfer polymerization", "RAFT polymerization", "PET-RAFT"

For ITP: "Iodine Transfer Polymerization", "Reversible complexation mediated polymerization", "Halogen-bonding-catalyzed living radical polymeriza", "Reversible Complexation Mediated Living Radical Polymerization"

For ROMP: "Ring-opening metathesis polymerisation", "ROMP"

For OMRP: "organometallic-mediated polymerization", "cobalt mediated radical polymerization", "cobalt-mediated radical polymerization"

Results were categorized by year, with all publications prior to the year 2000 being included within that year.

For Controlled Polymerization:

| Year | Anionic | Cationic | GTP | NMP | ATRP | RAFT | ITP | ROMP | OMRP |
|------|---------|----------|-----|-----|------|------|-----|------|------|
| 2000 | 2786    | 2866     | 349 | 9   | 532  | 7    | 3   | 404  | 4    |
| 2001 | 218     | 197      | 20  | 12  | 184  | 12   | 1   | 57   | 2    |
| 2002 | 213     | 171      | 15  | 14  | 272  | 36   | 1   | 126  | 2    |
| 2003 | 204     | 180      | 13  | 29  | 284  | 61   | 2   | 90   | 4    |
| 2004 | 223     | 214      | 17  | 30  | 369  | 106  | 2   | 73   | 2    |
| 2005 | 222     | 179      | 13  | 42  | 478  | 163  | 4   | 83   | 9    |
| 2006 | 266     | 187      | 17  | 69  | 492  | 204  | 7   | 105  | 9    |
| 2007 | 226     | 208      | 16  | 76  | 543  | 260  | 7   | 128  | 8    |
| 2008 | 250     | 186      | 18  | 94  | 639  | 288  | 10  | 126  | 10   |
| 2009 | 251     | 191      | 16  | 82  | 672  | 342  | 14  | 146  | 22   |
| 2010 | 220     | 227      | 15  | 91  | 633  | 380  | 10  | 159  | 17   |
| 2011 | 240     | 177      | 16  | 89  | 803  | 424  | 19  | 128  | 12   |
| 2012 | 211     | 192      | 25  | 86  | 785  | 468  | 19  | 139  | 18   |
| 2013 | 221     | 230      | 12  | 68  | 751  | 522  | 13  | 150  | 14   |
| 2014 | 221     | 199      | 18  | 58  | 841  | 647  | 11  | 154  | 19   |
| 2015 | 241     | 213      | 30  | 71  | 784  | 660  | 8   | 193  | 18   |
| 2016 | 238     | 194      | 22  | 84  | 679  | 686  | 16  | 168  | 20   |
| 2017 | 216     | 200      | 10  | 74  | 660  | 702  | 10  | 172  | 17   |
| 2018 | 190     | 198      | 15  | 45  | 650  | 655  | 20  | 176  | 17   |
| 2019 | 223     | 222      | 11  | 50  | 628  | 680  | 16  | 185  | 17   |
| 2020 | 200     | 198      | 18  | 59  | 530  | 626  | 15  | 157  | 13   |
| 2021 | 169     | 193      | 14  | 45  | 453  | 619  | 15  | 163  | 15   |
| 2022 | 98      | 133      | 9   | 27  | 279  | 433  | 8   | 95   | 5    |

For depolymerization:

| Year | Anionic | Cationic | GTP | NMP | ATRP | RAFT | ITP | ROMP | OMRP |
|------|---------|----------|-----|-----|------|------|-----|------|------|
| 2000 | 1       | 1        |     |     |      |      |     |      |      |
| 2001 |         |          |     |     |      |      |     |      |      |
| 2002 |         |          |     |     |      |      |     |      |      |
| 2003 |         |          |     |     |      |      |     |      |      |
| 2004 |         |          |     |     |      |      |     |      |      |
| 2005 |         |          |     |     |      |      |     |      |      |
| 2006 |         |          |     |     |      |      |     |      |      |
| 2007 |         |          |     |     |      |      |     |      |      |
| 2008 | 1       | 1        |     |     |      |      |     |      |      |
| 2009 |         |          |     |     |      |      |     |      |      |
| 2010 |         |          |     |     |      |      |     |      |      |
| 2011 |         |          |     |     |      |      |     |      |      |
| 2012 |         |          |     |     | 1    |      |     |      |      |
| 2013 |         |          |     |     |      |      |     |      |      |
| 2014 |         |          |     |     | 1    |      |     |      |      |
| 2015 |         |          |     |     |      |      |     |      |      |
| 2016 |         |          |     |     | 1    |      |     |      |      |
| 2017 |         |          |     |     |      |      |     |      |      |
| 2018 |         |          |     |     |      | 1    |     |      |      |
| 2019 |         | 1        |     |     | 1    |      |     | 1    |      |
| 2020 |         |          |     |     |      |      |     |      |      |
| 2021 |         |          |     |     | 2    | 1    |     | 1    |      |
| 2022 |         |          |     |     | 1    | 1    | 1   |      |      |
